# Supplementary material for: Insulin Receptor Substrate-1 (IRS-1) and IRS-2 expression levels are associated with prognosis in non-small cell lung cancer (NSCLC)
Source: PubMed Central journal article supplement (PMC6687170; doi:10.1371/journal.pone.0220567), 2019-08-08
Supplement: pone.0220567.s002.pdf [file pone.0220567.s002.pdf]

| Age at Dx | Sex    | Race             | Tumor Size (1, 2, 3, 4, or X) | Node Stat (0, 1, 2, or X) | Grade (1, 2, 3, or X) | ADJ Tx (Detail) (X= Unk; 0=None; 1= Chemo; 2=Rad; 3=Both) | F-up for RFS (X is unknown; Never canc free = 0) | Ever recurred (Rec =1; No rec = 0; X = Unknown) | F-up for OS | Vital Status (Dead = 0; Alive = 1) | Any IRS2 Membrane | TNM Clinical Stage Group (X = Unk, 1A,1B,2A,2B,3A,3B) | TNM Path Stage Group (X = Unk/None, 0, 1A,1B,2A,2B,3A,3B) | TNM/CS Mixed Stage Group (X = Unk, 1A,1B,2A,2B,3A,3B) | IRS-1 (0 = none; 1= Cyto; 2= Nuc; 3=both) | IRS-1 Grade Cyto | IRS-1 Grade Nuc | IRS-2 Grade Cyto | IRS-1/IRS-2 ratio (1=low IRS1 and low IRS2, 2=low IRS1 and high IRS2, 3=high IRS1 and low IRS2, 4=high IRS1 and high IRS2) |
|-----------|--------|------------------|-------------------------------|---------------------------|-----------------------|-----------------------------------------------------------|--------------------------------------------------|-------------------------------------------------|-------------|------------------------------------|-------------------|-------------------------------------------------------|-----------------------------------------------------------|-------------------------------------------------------|-------------------------------------------|------------------|-----------------|------------------|----------------------------------------------------------------------------------------------------------------------------|
| 55        | FEMALE | WHITE            | 2                             | 0                         | 2                     | 1                                                         | 64                                               | 0                                               | 75          | 1                                  | 0                 | 1B (1B)                                               | 1B                                                        | 1B                                                    | 0                                         | 0                | 0               | 1                | 1                                                                                                                          |
| 62        | FEMALE | OTHER            | 1A                            | 0                         | 1                     | 0                                                         | X                                                | X                                               | 60          | 1                                  | 1                 | 1A (1A)                                               | 1B                                                        | 1B                                                    | 1                                         | 2                | 0               | 1                | 3                                                                                                                          |
| 49        | FEMALE | WHITE            | 1A                            | 0                         | 1                     | 0                                                         | 49                                               | 0                                               | 75          | 1                                  | 1                 | 1A (1A)                                               | 1A                                                        | 1A                                                    | 0                                         | 0                | 0               | 3                | 2                                                                                                                          |
| 61        | FEMALE | WHITE            | 2                             | 0                         | 3                     | 0                                                         | 0                                                | 1                                               | 57          | 1                                  | 1                 | 1B (1B)                                               | 3B                                                        | 3B                                                    | 1                                         | 1                | 0               | 3                | 2                                                                                                                          |
| 86        | MALE   | WHITE            | X                             | 0                         | 2                     | 0                                                         | X                                                | X                                               | 65          | 1                                  | 0                 | 99 (X)                                                | 1B                                                        | 1B                                                    | 0                                         | 0                | 0               | 2                | 2                                                                                                                          |
| 67        | FEMALE | WHITE            | 3                             | 0                         | 3                     | 1                                                         | 40                                               | 0                                               | 57          | 1                                  | 1                 | 2B (2B)                                               | 3A                                                        | 3A                                                    | 0                                         | 0                | 0               | 1                | 1                                                                                                                          |
| 46        | FEMALE | WHITE            | 2                             | 0                         | 1                     | 0                                                         | 55                                               | 0                                               | 191         | 1                                  | 0                 | 1B (1B)                                               | X                                                         | 1B                                                    | 3                                         | 1                | 1               | 2                | 2                                                                                                                          |
| 71        | MALE   | WHITE            | 1                             | 0                         | 1                     | 0                                                         | 48                                               | 0                                               | 51          | 1                                  | 1                 | 1 (1)                                                 | X                                                         | 1                                                     | 0                                         | 0                | 0               | 3                | 2                                                                                                                          |
| 71        | MALE   | WHITE            | X                             | X                         | 1                     | 0                                                         | 19                                               | 0                                               | 136         | 0                                  | 1                 | 99 (X)                                                | 1A                                                        | 1A                                                    | 1                                         | 1                | 0               | 2                | 2                                                                                                                          |
| 70        | FEMALE | WHITE            | 1A                            | 0                         | 1                     | 0                                                         | X                                                | X                                               | 52          | 1                                  | 0                 | 1A (1A)                                               | 1A                                                        | 1A                                                    | 0                                         | 0                | 0               | 2                | 2                                                                                                                          |
| 75        | FEMALE | WHITE            | 1A                            | 0                         | 1                     | 0                                                         | 33                                               | 0                                               | 35          | 1                                  | 0                 | 1A (1A)                                               | 1A                                                        | 1A                                                    | 0                                         | 0                | 0               | 2                | 2                                                                                                                          |
| 62        | FEMALE | WHITE            | 2                             | 2                         | 1                     | 3                                                         | 8                                                | 0                                               | 21          | 1                                  | 0                 | 3A (3A)                                               | 3A                                                        | 3A                                                    | 0                                         | 0                | 0               | 2                | 2                                                                                                                          |
| 54        | MALE   | BLACK            | 1B                            | 0                         | 2                     | 0                                                         | 57                                               | 0                                               | 46          | 1                                  | 0                 | 1A (1A)                                               | 1A                                                        | 1A                                                    | 0                                         | 0                | 0               | 1                | 1                                                                                                                          |
| 70        | FEMALE | WHITE            | 1B                            | 0                         | 2                     | 0                                                         | 35                                               | 0                                               | 42          | 0                                  | 1                 | 1A (1A)                                               | 1A                                                        | 1A                                                    | 3                                         | 2                | 3               | 2                | 4                                                                                                                          |
| 75        | FEMALE | WHITE            | 3                             | 0                         | 2                     | 1                                                         | 21                                               | 1                                               | 43          | 0                                  | 0                 | 2B (2B)                                               | 2B                                                        | 2B                                                    | 0                                         | 0                | 0               | 1                | 1                                                                                                                          |
| 67        | FEMALE | WHITE            | 1A                            | 0                         | 2                     | 0                                                         | 34                                               | 0                                               | 54          | 1                                  | 1                 | 0                                                     | NONE                                                      | NONE                                                  | 3                                         | 2                | 3               | 2                | 4                                                                                                                          |
| 40        | FEMALE | ASIAN OTHER/NO S | 3                             | 2                         | X                     | 3                                                         | 0                                                | 1                                               | 15          | 0                                  | 1                 | 3A (3A)                                               | 3A                                                        | 3A                                                    | 3                                         | 3                | 1               |                  |                                                                                                                            |
| 81        | FEMALE | WHITE            | 1B                            | 0                         | 2                     | 0                                                         | X                                                | X                                               | 51          | 1                                  | 0                 | 0                                                     | NONE                                                      | NONE                                                  | 3                                         | 2                | 3               | 3                | 4                                                                                                                          |
| 50        | FEMALE | WHITE            | 1A                            | 0                         | 2                     | 0                                                         | 12                                               | 1                                               | 53          | 1                                  | 1                 | 1A (1A)                                               | 1A                                                        | 1A                                                    | 3                                         | 1                | 2               | 1                | 3                                                                                                                          |
| 66        | MALE   | WHITE            | 1                             | 0                         | 2                     | 0                                                         | 5                                                | 0                                               | 28          | 1                                  | 1                 | 1 (1)                                                 | 1B                                                        | 1B                                                    | 1                                         | 3                | 0               | 1                | 3                                                                                                                          |
| 63        | FEMALE | WHITE            | 3                             | 0                         | 1                     | 0                                                         | 12                                               | 1                                               | 32          | 1                                  | 1                 | 2B (2B)                                               | 2B                                                        | 2B                                                    | 1                                         | 1                | 0               |                  |                                                                                                                            |
| 69        | FEMALE | WHITE            | 2B                            | 0                         | 1                     | 1                                                         | 57                                               | 0                                               | 76          | 1                                  | 1                 | 2A (2A)                                               | 2B                                                        | 2B                                                    | 0                                         | 0                | 0               | 1                | 1                                                                                                                          |
| 53        | FEMALE | WHITE            | 2A                            | 0                         | 2                     | 0                                                         | X                                                | X                                               | 73          | 1                                  | 0                 | 2A (2A)                                               | 1B                                                        | 1B                                                    | 0                                         | 0                | 0               |                  |                                                                                                                            |
| 68        | FEMALE | WHITE            | 1A                            | 0                         | 2                     | 0                                                         | 13                                               | 1                                               | 71          | 1                                  | 0                 | 1A (1A)                                               | 1A                                                        | 1A                                                    | 1                                         | 1                | 0               | 1                | 1                                                                                                                          |
| 80        | FEMALE | WHITE            | 1B                            | 0                         | 2                     | 0                                                         | X                                                | X                                               | 70          | 1                                  | 0                 | 1A (1A)                                               | 1A                                                        | 1A                                                    | 1                                         | 2                | 0               | 1                | 3                                                                                                                          |
| 56        | FEMALE | WHITE            | 1B                            | 0                         | X                     | 0                                                         | 54                                               | 0                                               | 74          | 1                                  | 1                 | 1A (1A)                                               | 1A                                                        | 1A                                                    | 1                                         | 1                | 1               | 1                | 1                                                                                                                          |
| 67        | FEMALE | WHITE            | 1A                            | 0                         | 3                     | 0                                                         | 56                                               | 1                                               | 56          | 1                                  | 0                 | 1 (1)                                                 | 1                                                         | 1                                                     | 1                                         | 1                | 0               | 0                | 1                                                                                                                          |
| 57        | MALE   | WHITE            | NONE                          | NONE                      | 3                     | 3                                                         | 57                                               | 0                                               | 74          | 1                                  | 1                 | 99 (X)                                                | X                                                         | 3A                                                    | 3                                         | 1                | 2               | 2                | 4                                                                                                                          |
| 62        | FEMALE | WHITE            | 1A                            | 0                         | 1                     | 0                                                         | 57                                               | 0                                               | 67          | 1                                  | 1                 | 1 (1)                                                 | 1                                                         | 1                                                     | 3                                         | 1                | 1               | 1                | 1                                                                                                                          |
| 66        | MALE   | WHITE            | 1A                            | 0                         | 2                     | 0                                                         | 45                                               | 0                                               | 64          | 1                                  | 1                 | 1A (1A)                                               | 1B                                                        | 1B                                                    | 1                                         | 1                | 0               | 1                | 1                                                                                                                          |
| 66        | FEMALE | WHITE            | 1A                            | 0                         | X                     | 0                                                         | 41                                               | 0                                               | 57          | 1                                  | 1                 | 1A (1A)                                               | 1A                                                        | 1A                                                    | 0                                         | 0                | 0               | 2                | 2                                                                                                                          |
| 66        | FEMALE | WHITE            | 1A                            | 0                         | X                     | 0                                                         | 30                                               | 0                                               | 52          | 1                                  | 1                 | 1A (1A)                                               | 1A                                                        | 1A                                                    | 1                                         | 1                | 0               | 1                | 1                                                                                                                          |
| 60        | FEMALE | WHITE            | 2A                            | 2                         | 3                     | 3                                                         | 33                                               | 0                                               | 54          | 1                                  | 0                 | 3A (3A)                                               | X                                                         | 3A                                                    | 1                                         | 1                | 0               | 0                | 1                                                                                                                          |
| 86        | FEMALE | WHITE            | 1A                            | 0                         | 2                     | 0                                                         | 33                                               | 1                                               | 33          | 1                                  | 1                 | 1A (1A)                                               | NONE                                                      | 1A                                                    | 1                                         | 1                | 0               | 1                | 1                                                                                                                          |
| 55        | FEMALE | WHITE            | 2A                            | 2                         | 3                     | 0                                                         | 10                                               | 0                                               | 13          | 1                                  | 0                 | 3A (3A)                                               | 1A                                                        | 1A                                                    | 1                                         | 1                | 0               | 1                | 1                                                                                                                          |
| 81        | FEMALE | WHITE            | 2A                            | 0                         | 2                     | 2                                                         | 4                                                | 0                                               | 9           | 1                                  | 1                 | 1B (1B)                                               | 3A                                                        | 3A                                                    | 1                                         | 1                | 0               | 1                | 1                                                                                                                          |
| 67        | FEMALE | WHITE            | 1A                            | 0                         | 2                     | 0                                                         | 19                                               | 0                                               | 37          | 1                                  | 0                 | 1A (1A)                                               | 1A                                                        | 1A                                                    | 0                                         | 0                | 0               | 1                | 1                                                                                                                          |
| 75        | MALE   | WHITE            | 2                             | 1                         | 3                     | 0                                                         | 8                                                | 0                                               | 30          | 1                                  | 0                 | 2 (2)                                                 | 2B                                                        | 2B                                                    | 1                                         | 1                | 0               | 1                | 1                                                                                                                          |
| 78        | FEMALE | WHITE            | 3                             | 0                         | 3                     | 0                                                         | 12                                               | 1                                               | 13          | 0                                  | 0                 | 2B (2B)                                               | 2B                                                        | 2B                                                    | 1                                         | 1                | 0               | 1                | 1                                                                                                                          |
| 54        | FEMALE | WHITE            | 4                             | 0                         | 2                     | 1                                                         | 16                                               | 1                                               | 31          | 1                                  | 0                 | 3A (3A)                                               | 1B                                                        | 1B                                                    | 1                                         | 1                | 0               | 1                | 1                                                                                                                          |
| 52        | FEMALE | WHITE            | 1A                            | 0                         | 2                     | 0                                                         | X                                                | X                                               | 22          | 0                                  | 0                 | 1A (1A)                                               | 1B                                                        | 1B                                                    | 0                                         | 0                | 0               |                  |                                                                                                                            |
| 76        | FEMALE | WHITE            | 3                             | 0                         | 1                     | 0                                                         | 3                                                | 1                                               | 22          | 0                                  | 1                 | 2B (2B)                                               | 2A                                                        | 2A                                                    | 1                                         | 1                | 0               | 2                | 2                                                                                                                          |
| 51        | FEMALE | WHITE            | 2A                            | 0                         | X                     | 2                                                         | X                                                | X                                               | 30          | 0                                  | 0                 | 4 (4)                                                 | 4                                                         | 4                                                     | 1                                         | 1                | 0               | 2                | 2                                                                                                                          |
| 79        | MALE   | WHITE            | X                             | X                         | 1                     | 0                                                         | 32                                               | 0                                               | 65          | 0                                  | 1                 | 99 (X)                                                | 1                                                         | 1                                                     | 0                                         | 0                | 0               | 3                | 2                                                                                                                          |
| 84        | MALE   | WHITE            | X                             | X                         | 1                     | 0                                                         | 0                                                | 1                                               | 50          | 0                                  | 0                 | 99 (X)                                                | 1B                                                        | 1B                                                    | 3                                         | 1                | 1               | 2                | 2                                                                                                                          |
| 73        | FEMALE | WHITE            | 4                             | 0                         | 2                     | 0                                                         | 9                                                | 1                                               | 13          | 0                                  | 1                 | 3B (3B)                                               | 1B                                                        | 1B                                                    | 3                                         | 1                | 1               | 2                | 2                                                                                                                          |
| 59        | MALE   | WHITE            | 2                             | X                         | X                     | 1                                                         | 0                                                | 1                                               | 34          | 0                                  | 0                 | 1 (1)                                                 | X                                                         | 1                                                     | 3                                         | 2                | 1               | 2                | 4                                                                                                                          |
| 76        | FEMALE | WHITE            | 3                             | 0                         | 1                     | 0                                                         | 10                                               | 1                                               | 24          | 0                                  | 1                 | 2B (2B)                                               | 2B                                                        | 2B                                                    | 1                                         | 2                | 0               | 2                | 4                                                                                                                          |
| 75        | MALE   | WHITE            | 2                             | 0                         | 3                     | 1                                                         | X                                                | X                                               | 3           | 0                                  | 1                 | 1B (1B)                                               | 3A                                                        | 3A                                                    | 1                                         | 2                | 0               | 1                | 3                                                                                                                          |
| 66        | FEMALE | WHITE            | 1A                            | 0                         | 2                     | 0                                                         | 25                                               | 1                                               | 33          | 0                                  | 1                 | 1A (1A)                                               | 1A                                                        | 1A                                                    | 3                                         | 1                | 1               | 1                | 1                                                                                                                          |
| 79        | MALE   | WHITE            | X                             | 0                         | 2                     | 0                                                         | 23                                               | 0                                               | 34          | 0                                  | 1                 | 99 (X)                                                | 1B                                                        | 1B                                                    | 3                                         | 1                | 2               | 2                | 2                                                                                                                          |
| 80        | FEMALE | WHITE            | 1A                            | 0                         | 2                     | 0                                                         | 1                                                | 0                                               | 2           | 0                                  | 1                 | 1A (1A)                                               | 1B                                                        | 1B                                                    | 3                                         | 1                | 2               | 1                | 1                                                                                                                          |
| 69        | FEMALE | WHITE            | NONE                          | NONE                      | 3                     | 1                                                         | 14                                               | 1                                               | 46          | 0                                  | 0                 | 99 (X)                                                | 3A                                                        | 3A                                                    | 0                                         |                  |                 | 1                | 1                                                                                                                          |
| 74        | FEMALE | WHITE            | 1A                            | 0                         | 2                     | 1                                                         | 32                                               | 1                                               | 51          | 0                                  | 0                 | 1A (1A)                                               | 2A                                                        | 2A                                                    | 1                                         |                  |                 | 0                | 1                                                                                                                          |
| 69        | FEMALE | WHITE            | NONE                          | NONE                      | 1                     | 0                                                         | 99                                               | 0                                               | 99          | 0                                  | 1                 | 99 (X)                                                | 1A                                                        | 1A                                                    | 1                                         | 1                | 0               | 2                | 2                                                                                                                          |
| 68        | FEMALE | WHITE            | 1A                            | 0                         | 2                     | 0                                                         | 4                                                | 1                                               | 8           | 0                                  | 0                 | 1A (1A)                                               | 1A                                                        | 1A                                                    | 0                                         | 0                | 0               | 2                | 2                                                                                                                          |
| 68        | MALE   | WHITE            | X                             | X                         | 3                     | 0                                                         | 14                                               | 1                                               | 51          | 0                                  | 1                 | 99 (X)                                                | 1A                                                        | 1A                                                    | 1                                         | 1                | 0               | 1                | 1                                                                                                                          |
| 67        | FEMALE | WHITE            | 2                             | 0                         | 2                     | 3                                                         | 3                                                | 1                                               | 9           | 0                                  | 1                 | 1B (1B)                                               | X                                                         | 1B                                                    | 1                                         | 1                | 0               | 2                | 2                                                                                                                          |
| 72        | MALE   | WHITE            | X                             | X                         | 2                     | 0                                                         | 36                                               | 0                                               | 36          | 0                                  | 1                 | 99 (X)                                                | 1A                                                        | 1A                                                    | 1                                         | 1                | 0               | 2                | 2                                                                                                                          |
| 73        | MALE   | WHITE            | 1A                            | 0                         | 3                     | 0                                                         | 15                                               | 1                                               | 20          | 0                                  | 1                 | 1A (1A)                                               | 3A                                                        | 3A                                                    | 1                                         | 1                | 0               |                  |                                                                                                                            |
| 55        | MALE   | WHITE            | 3                             | 0                         | 3                     | 0                                                         | X                                                | X                                               | 19          | 0                                  | 1                 | 2B (2B)                                               | 2B                                                        | 2B                                                    | 1                                         | 1                | 0               | 2                | 2                                                                                                                          |
| 81        | FEMALE | WHITE            | 1                             | 0                         | 3                     | 2                                                         | 0                                                | 1                                               | 4           | 0                                  | 0                 | 1A (1A)                                               | 4                                                         | 4                                                     | 0                                         | 0                | 0               |                  | 1                                                                                                                          |
| 64        | FEMALE | WHITE            | 1A                            | 0                         | 2                     | 1                                                         | 5                                                | 0                                               | 6           | 0                                  | 0                 | 1A (1A)                                               | 3A                                                        | 3A                                                    | 3                                         | 2                | 1               | 2                | 4                                                                                                                          |

Adenocarcinoma

| Age at Dx | Sex    | Race    | Tum Size<br>(0, 1, 2, 3,<br>or X) | Node Stat<br>(0, 1, 2, or<br>X) | Grade (1,<br>2, 3, or X) | ADJ Tx (Detail)<br>(X= Unk;<br>0=None; 1=<br>Chemo; 2=Rad;<br>3=Both) | F-up for RFS (X<br>is unknown;<br>Never canc free<br>= 0; M is <1mo<br>Ca Free f/up) | Ever recurred<br>(Rec =1; No<br>rec = 0; X =<br>Unknown) | F-up for OS | Vital Status<br>(Dead = 0;<br>Alive = 1) | Any IRS2<br>Membrane | TNM Clinical<br>Stage Group<br>(99/X = Unk,<br>1A,1B,2A,2B,3<br>A,3B) | TNM Path<br>Stage Group<br>(X = Unk,<br>1A,1B,2A,2B,3<br>A,3B) | TNM/CS<br>Mixed Stage<br>Group (X =<br>Unk,<br>1A,1B,2A,2B,<br>3A,3B) | IRS-1 (0 =<br>none; 1=<br>Cyto; 2= Nuc;<br>3=both) | IRS-1 Grade<br>Cyto | IRS-1 Grade<br>Nuc | IRS-2 Grade | IRS-1/IRS-2 ratio (1=low<br>IRS1 and low IRS2,<br>2=low. IRS1 and high<br>IRS2, 3=high IRS1 and<br>low IRS2, 4=high IRS1<br>and high IRS2) |
|-----------|--------|---------|-----------------------------------|---------------------------------|--------------------------|-----------------------------------------------------------------------|--------------------------------------------------------------------------------------|----------------------------------------------------------|-------------|------------------------------------------|----------------------|-----------------------------------------------------------------------|----------------------------------------------------------------|-----------------------------------------------------------------------|----------------------------------------------------|---------------------|--------------------|-------------|--------------------------------------------------------------------------------------------------------------------------------------------|
| 72        | MALE   | WHITE   | NONE                              | NONE                            | 3                        | 0                                                                     | 0                                                                                    | 1                                                        | 9           | 1                                        | 0                    | 99 (X)                                                                | 2B                                                             | 2B                                                                    | 3                                                  | 1                   | 2                  |             |                                                                                                                                            |
| 62        | MALE   | WHITE   | 1A                                | 0                               | 2                        | 0                                                                     | 20                                                                                   | 1                                                        | 48          | 1                                        | 1                    | 1A (1A)                                                               | 1A                                                             | 1A                                                                    | 0                                                  | 0                   | 0                  |             |                                                                                                                                            |
| 53        | FEMALE | WHITE   | 3                                 | 2                               | 3                        | 0                                                                     | X                                                                                    | 0                                                        | 65          | 1                                        | 1                    | 3A (3A)                                                               | 1A                                                             | 1A                                                                    | 3                                                  | 2                   | 2                  | 2           | 4                                                                                                                                          |
| 57        | MALE   | WHITE   | 2B                                | 1                               | 3                        | 1                                                                     | 35                                                                                   | 0                                                        | 64          | 1                                        | 1                    | 2B (2B)                                                               | 3A                                                             | 3A                                                                    | 1                                                  | 3                   | 0                  | 1           | 3                                                                                                                                          |
| 76        | MALE   | WHITE   | 3                                 | 1                               | 2                        | 0                                                                     | 3                                                                                    | 0                                                        | 66          | 1                                        | 1                    | 3A (3A)                                                               | 1B                                                             | 1B                                                                    | 3                                                  | 3                   | 2                  | 3           | 4                                                                                                                                          |
| 75        | MALE   | WHITE   | 2                                 | 0                               | 2                        | 0                                                                     | 77                                                                                   | 0                                                        | 169         | 0                                        | 1                    | 1B (1B)                                                               | X                                                              | 1B                                                                    | 3                                                  | 2                   | 2                  | 1           | 3                                                                                                                                          |
| 67        | MALE   | WHITE   | 2                                 | 0                               | 3                        | 0                                                                     | 88                                                                                   | 0                                                        | 201         | 1                                        | 0                    | 1B (1B)                                                               | X                                                              | 1B                                                                    | 0                                                  | 0                   | 0                  |             |                                                                                                                                            |
| 64        | FEMALE | WHITE   | 1                                 | 0                               | 2                        | 0                                                                     | 170                                                                                  | 0                                                        | 172         | 1                                        | 1                    | 1A (1A)                                                               | X                                                              | 1A                                                                    | 3                                                  | 3                   | 3                  | 1           | 3                                                                                                                                          |
| 64        | MALE   | LAOTIAN | 3                                 | 0                               | 3                        | 0                                                                     | 87                                                                                   | 0                                                        | 193         | 1                                        | 1                    | 2B (2B)                                                               | 1B                                                             | 1B                                                                    | 1                                                  | 2                   | 1                  | 0           | 3                                                                                                                                          |
| 62        | MALE   | WHITE   | X                                 | X                               | 2                        | 0                                                                     | 129                                                                                  | 0                                                        | 170         | 1                                        | 1                    | 99 (X)                                                                | 1B                                                             | 1B                                                                    | 1                                                  | 2                   | 0                  | 2           | 4                                                                                                                                          |
| 75        | FEMALE | WHITE   | X                                 | X                               | 2                        | 0                                                                     | 26                                                                                   | 0                                                        | 149         | 0                                        | 1                    | 99 (X)                                                                | 1A                                                             | 1A                                                                    | 0                                                  | 0                   | 0                  | 2           | 2                                                                                                                                          |
| 72        | MALE   | WHITE   | 3                                 | 0                               | 2                        | 0                                                                     | 37                                                                                   | 0                                                        | 58          | 1                                        | 1                    | 2B (2B)                                                               | 2B                                                             | 2B                                                                    | 1                                                  | 1                   | 0                  | 1           | 1                                                                                                                                          |
| 62        | MALE   | WHITE   | 3                                 | 0                               | 2                        | 1                                                                     | 3                                                                                    | 0                                                        | 13          | 1                                        | 1                    | 2B (2B)                                                               | 2B                                                             | 2B                                                                    | 0                                                  | 0                   | 0                  | 2           | 2                                                                                                                                          |
| 74        | MALE   | WHITE   | 1B                                | 0                               | 2                        | 0                                                                     | 31                                                                                   | 1                                                        | 42          | 1                                        | 0                    | 1A (1A)                                                               | 1A                                                             | 1A                                                                    | 1                                                  | 1                   | 0                  | 2           | 2                                                                                                                                          |
| 64        | MALE   | WHITE   | NONE                              | NONE                            | 2                        | 0                                                                     | 23                                                                                   | 1                                                        | 46          | 1                                        | 0                    | (NONE)                                                                | NONE                                                           | NONE                                                                  | 0                                                  | 0                   | 0                  | 0           | 1                                                                                                                                          |
| 63        | FEMALE | WHITE   | X                                 | 0                               | 2                        | 1                                                                     | 7                                                                                    | 1                                                        | 37          | 0                                        | 0                    | 99 (X)                                                                | 3A                                                             | 3A                                                                    | 1                                                  | 1                   | 0                  | 2           | 2                                                                                                                                          |
| 72        | MALE   | WHITE   | 2A                                | 0                               | 1                        | 0                                                                     | X                                                                                    | 0                                                        | 1           | 1                                        | 0                    | 1B (1B)                                                               | 1B                                                             | 1B                                                                    | 1                                                  | 1                   | 0                  | 1           | 1                                                                                                                                          |
| 77        | MALE   | WHITE   | 1A                                | 0                               | 2                        | 0                                                                     | 3                                                                                    | 0                                                        | 4           | 1                                        | 1                    | 1A (1A)                                                               | 1A                                                             | 1A                                                                    | 1                                                  | 1                   | 0                  | 2           | 2                                                                                                                                          |
| 69        | FEMALE | WHITE   | 3                                 | 0                               | 3                        | 0                                                                     | 16                                                                                   | 1                                                        | 22          | 0                                        | 1                    | 2B (2B)                                                               | 2B                                                             | 2B                                                                    | 1                                                  | 1                   | 0                  | 2           | 2                                                                                                                                          |
| 49        | FEMALE | WHITE   | X                                 | X                               | 3                        | 1                                                                     | 47                                                                                   | 0                                                        | 72          | 1                                        | 1                    | 99 (X)                                                                | 2B                                                             | 3                                                                     | 0                                                  | 0                   | 0                  | 2           | 2                                                                                                                                          |
| 59        | FEMALE | WHITE   | 2                                 | 0                               | 3                        | 1                                                                     | 0                                                                                    | 1                                                        | 70          | 1                                        | 1                    | 2 (2)                                                                 | 2B                                                             | 2B                                                                    | 1                                                  | 2                   | 0                  | 2           | 4                                                                                                                                          |
| 75        | FEMALE | WHITE   | 1                                 | 0                               | 2                        | 0                                                                     | 57                                                                                   | 0                                                        | 87          | 0                                        | 1                    | 1 (1)                                                                 | 1                                                              | 1                                                                     | 1                                                  | 1                   | 0                  |             |                                                                                                                                            |
| 63        | MALE   | UNKNOWN | 2A                                | 0                               | 2                        | 0                                                                     | X                                                                                    | 0                                                        | 11          | 1                                        | 0                    | 1B (1B)                                                               | 1B                                                             | 1B                                                                    | 1                                                  | 1                   | 0                  | 1           | 1                                                                                                                                          |
| 56        | FEMALE | WHITE   | 1                                 | 1                               | 3                        | 1                                                                     | 9                                                                                    | 1                                                        | 65          | 1                                        | 1                    | 2A (2A)                                                               | 2A                                                             | 2A                                                                    | 3                                                  | 3                   | 2                  |             |                                                                                                                                            |
| 70        | MALE   | WHITE   | 2A                                | 0                               | 3                        | 1                                                                     | 49                                                                                   | 0                                                        | 74          | 1                                        | 1                    | 2A (2A)                                                               | 2A                                                             | 2A                                                                    | 3                                                  | 2                   | 1                  | 1           | 3                                                                                                                                          |
| 54        | MALE   | WHITE   | 2A                                | 0                               | 2                        | 1                                                                     | 16                                                                                   | 1                                                        | 23          | 0                                        | 0                    | 1B (1B)                                                               | 2A                                                             | 2A                                                                    | 1                                                  | 1                   | 0                  | 1           | 1                                                                                                                                          |
| 68        | FEMALE | BLACK   | 3                                 | 0                               | 2                        | 1                                                                     | 19                                                                                   | 0                                                        | 37          | 1                                        | 1                    | 2B (2B)                                                               | 3A                                                             | 3A                                                                    | 1                                                  | 1                   | 0                  | 2           | 2                                                                                                                                          |
| 73        | FEMALE | WHITE   | 2                                 | 0                               | 2                        | 0                                                                     | 16                                                                                   | 0                                                        | 79          | 0                                        | 0                    | 1B (1B)                                                               | 1B                                                             | 1B                                                                    | 0                                                  | 0                   | 0                  | 0           | 1                                                                                                                                          |
| 77        | MALE   | WHITE   | 2                                 | 0                               | 3                        | 0                                                                     | 9                                                                                    | 1                                                        | 14          | 0                                        | 1                    | 1B (1B)                                                               | 1B                                                             | 1B                                                                    | 0                                                  | 0                   | 0                  | 1           | 1                                                                                                                                          |
| 71        | MALE   | WHITE   | 1A                                | 0                               | 2                        | 3                                                                     | 11                                                                                   | 1                                                        | 19          | 0                                        | 0                    | 1A (1A)                                                               | 2A                                                             | 2A                                                                    | 1                                                  | 1                   | 0                  |             |                                                                                                                                            |
| 55        | MALE   | WHITE   | 2A                                | 0                               | 2                        | 0                                                                     | M                                                                                    | 0                                                        | 5           | 0                                        | 1                    | 1B (1B)                                                               | 1B                                                             | 1B                                                                    | 1                                                  | 1                   | 0                  | 2           | 2                                                                                                                                          |
| 73        | FEMALE | WHITE   | 1                                 | 0                               | 2                        | 0                                                                     | 1                                                                                    | 0                                                        | 35          | 0                                        | 1                    | 1A (1A)                                                               | 1B                                                             | 1B                                                                    | 1                                                  | 1                   | 0                  | 2           | 2                                                                                                                                          |
| 80        | MALE   | WHITE   | 1B                                | 0                               | 3                        | 0                                                                     | M                                                                                    | 0                                                        | 11          | 0                                        | 1                    | 1A (1A)                                                               | 1B                                                             | 1B                                                                    | 1                                                  | 2                   | 1                  | 1           | 3                                                                                                                                          |
| 72        | MALE   | WHITE   | X                                 | X                               | 3                        | 0                                                                     | 16                                                                                   | 0                                                        | 16          | 0                                        | 1                    | 99 (X)                                                                | 1B                                                             | 1B                                                                    | 0                                                  | 0                   | 0                  |             |                                                                                                                                            |
| 72        | MALE   | WHITE   | X                                 | X                               | 2                        | 0                                                                     | 36                                                                                   | 1                                                        | 46          | 0                                        | 1                    | 99 (X)                                                                | 1B                                                             | 1B                                                                    | 0                                                  | 0                   | 0                  | 1           | 1                                                                                                                                          |
| 69        | MALE   | WHITE   | NONE                              | NONE                            | 2                        | 0                                                                     | 19                                                                                   | 0                                                        | 106         | 0                                        | 1                    | 99 (X)                                                                | 1                                                              | 1                                                                     | 0                                                  | 0                   | 0                  | 3           | 2                                                                                                                                          |
| 73        | FEMALE | WHITE   | X                                 | X                               | 2                        | 0                                                                     | 6                                                                                    | 1                                                        | 17          | 0                                        | 1                    | 99 (X)                                                                | 1B                                                             | 1B                                                                    | 0                                                  | 0                   | 0                  | 2           | 2                                                                                                                                          |
| 69        | MALE   | WHITE   | 2                                 | 2                               | X                        | 3                                                                     | M                                                                                    | 0                                                        | 6           | 0                                        | 0                    | 3A (3A)                                                               | NONE                                                           | 3A                                                                    | 0                                                  | 0                   | 0                  |             |                                                                                                                                            |
| 76        | MALE   | WHITE   | 4                                 | 0                               | 2                        | 0                                                                     | 5                                                                                    | 0                                                        | 17          | 0                                        | 1                    | 3A (3A)                                                               | 3A                                                             | 3A                                                                    |                                                    |                     |                    | 2           |                                                                                                                                            |
| 77        | MALE   | WHITE   | 2A                                | 0                               | 2                        | 0                                                                     | X                                                                                    | 0                                                        | 4           | 0                                        | 0                    | 1B (1B)                                                               | 1B                                                             | 1B                                                                    | 0                                                  | 0                   | 0                  | 3           | 2                                                                                                                                          |
| 67        | FEMALE | WHITE   | 3                                 | 0                               | 2                        | 0                                                                     | X                                                                                    | 0                                                        | 15          | 0                                        | 1                    | 2B (2B)                                                               | 3A                                                             | 3A                                                                    | 0                                                  | 0                   | 0                  | 3           | 2                                                                                                                                          |
| 81        | FEMALE | WHITE   | 2A                                | 0                               | 2                        | 0                                                                     | M                                                                                    | 0                                                        | 23          | 0                                        | 1                    | 1B (1B)                                                               | 1A                                                             | 1A                                                                    | 1                                                  | 1                   | 0                  | 3           | 2                                                                                                                                          |
| 80        | MALE   | WHITE   | X                                 | 0                               | 2                        | 0                                                                     | X                                                                                    | 0                                                        | 2           | 0                                        | 1                    | 99 (X)                                                                | 1A                                                             | 1A                                                                    | 1                                                  | 2                   | 0                  | 1           | 3                                                                                                                                          |
| 78        | MALE   | WHITE   | 1A                                | 0                               | 2                        | 0                                                                     | 0                                                                                    | 1                                                        | 26          | 0                                        | 1                    | 1A (1A)                                                               | 1A                                                             | 1A                                                                    | 1                                                  | 1                   | 0                  |             |                                                                                                                                            |

Squamous Cell Carcinoma
